# Supplementary figures and images for: Carbon dots obtained using hydrothermal treatment of formaldehyde. Cell imaging in vitro
Source: Royal Society of Chemistry journal article supplement (doi:10.1039/c4nr01585a), 2014-01-01

Supplementary Information

<sup>1</sup>H-NMR

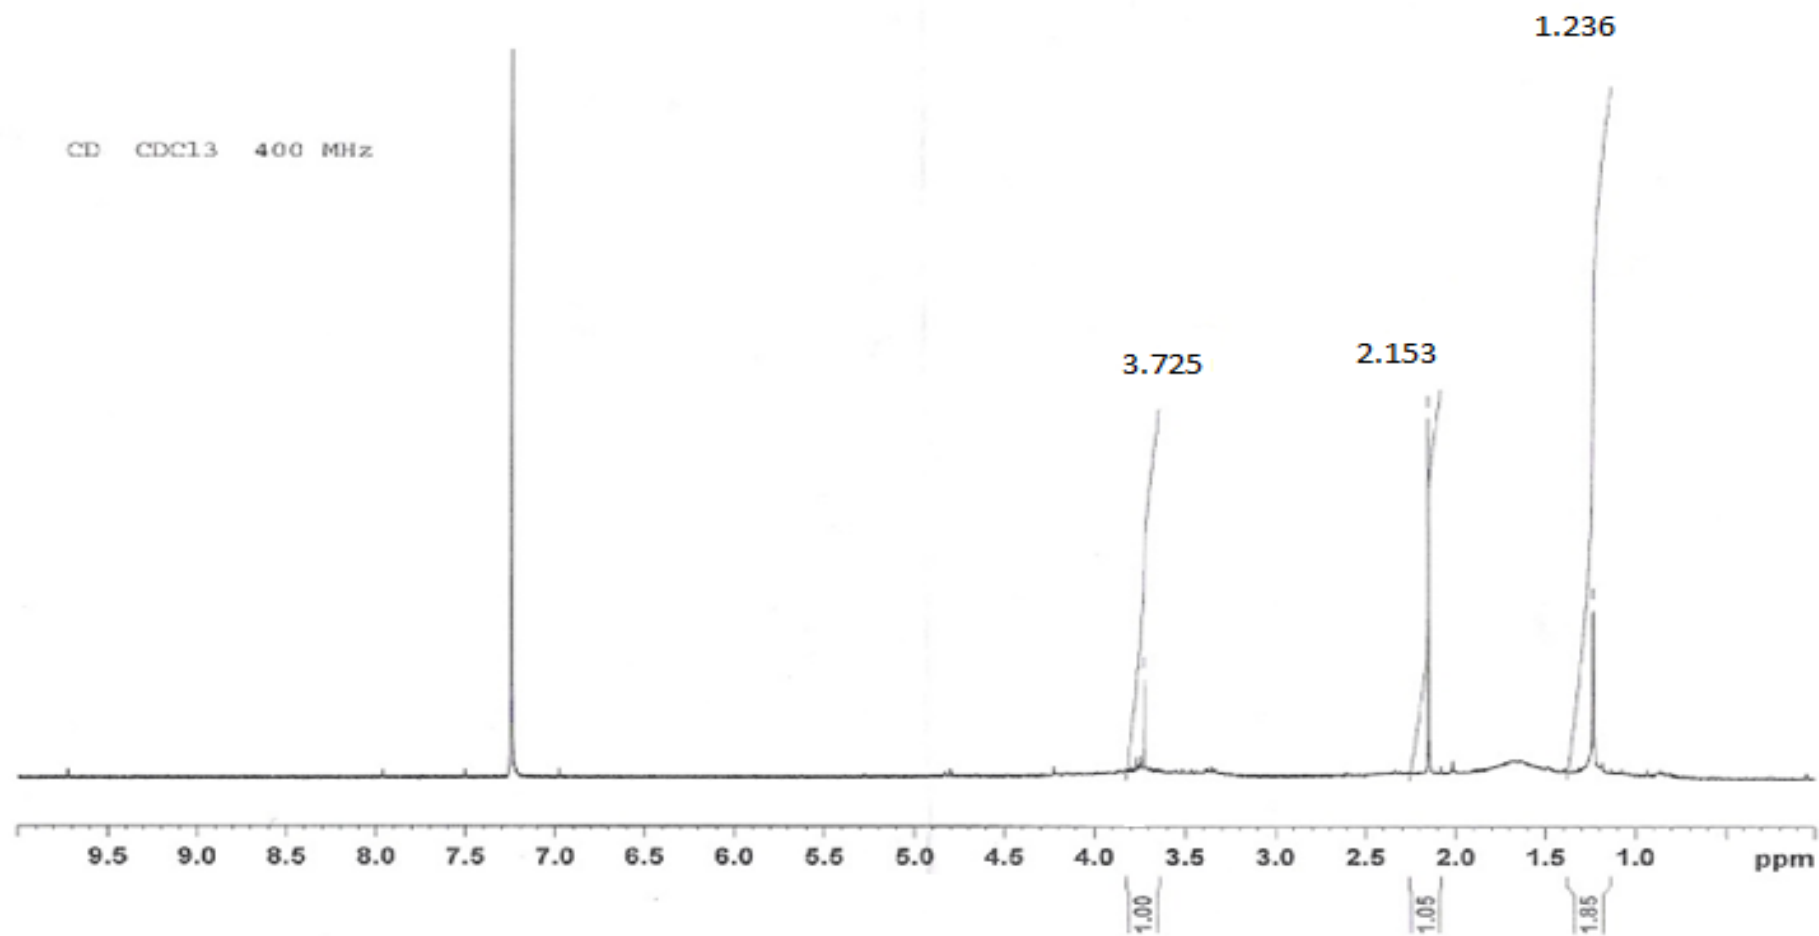

<sup>13</sup>C-NMR

CD2rep.car CDCl3 400 MHz

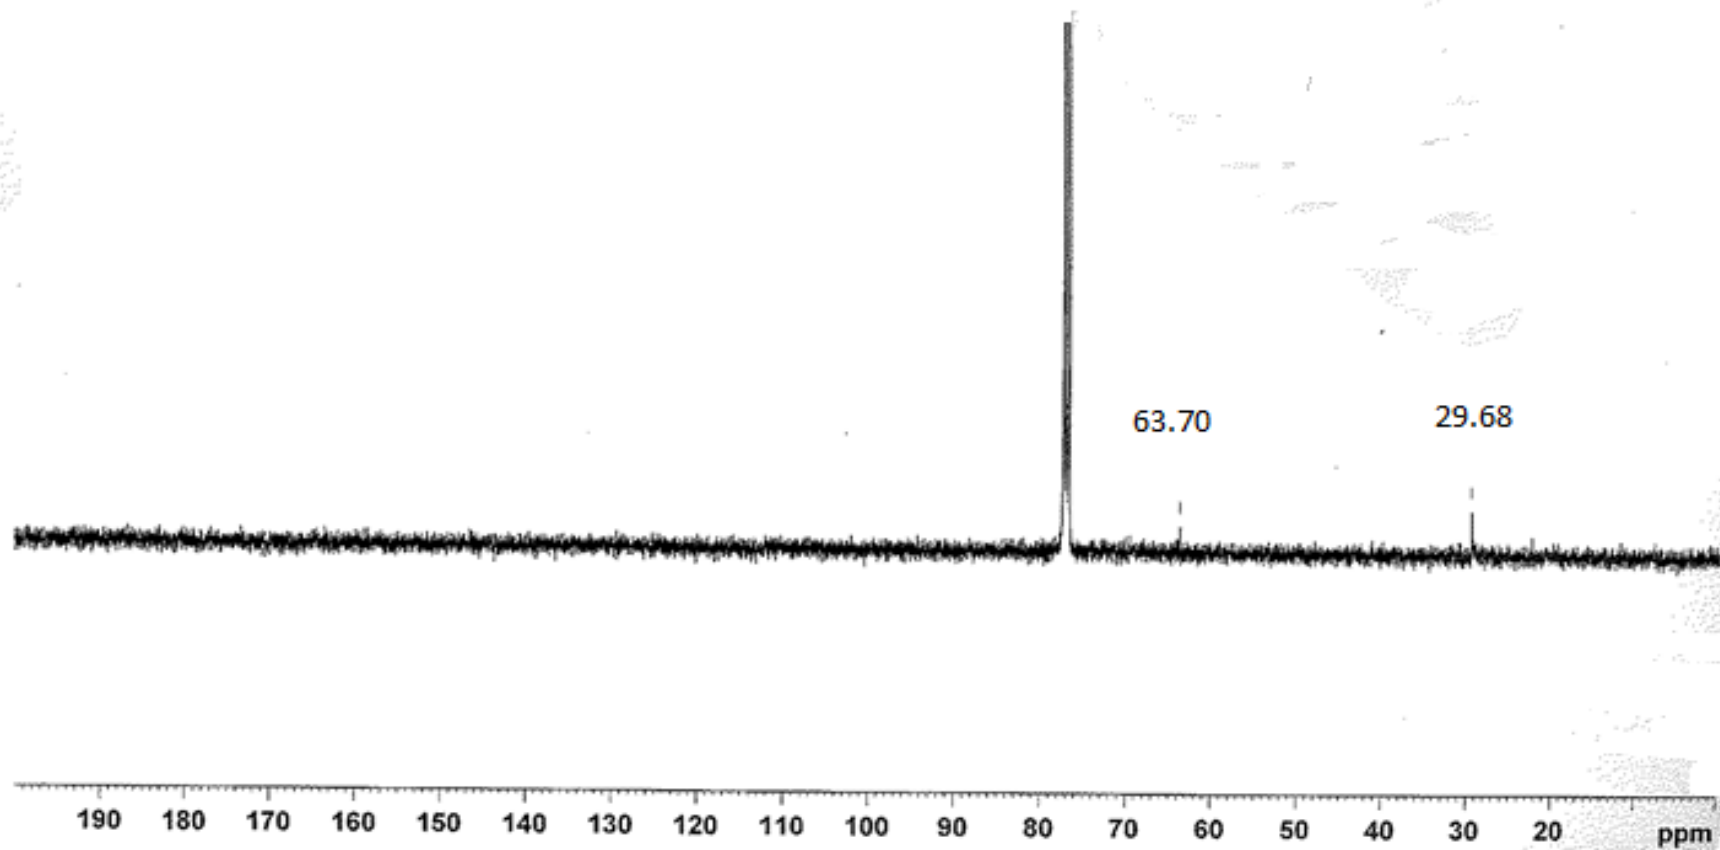

Supplement: c4nr01585a1.pdf [file c4nr01585a1.pdf]
